# Supplementary material
Source: PubMed Central journal article supplement (PMC3617563)
Supplement: NIHMS426720-supplement-1_si_001.pdf [file NIHMS426720-supplement-1_si_001.pdf]

## **SUPPORTING INFORMATION**

### **Transient kinetic analysis of USP2-catalyzed deubiquitination reveals a conformational rearrangement in the K48-linked diubiquitin substrate**

William P. Bozza, Qin Liang, Ping Gong and Zhihao Zhuang<sup>‡</sup>

214A Drake Hall, Department of Chemistry and Biochemistry, University of Delaware  
Newark, DE, 19716

<sup>‡</sup> Corresponding author: Phone: 302-831-8940; Fax: 302-831-6335; Email: [zzhuang@udel.edu](mailto:zzhuang@udel.edu)

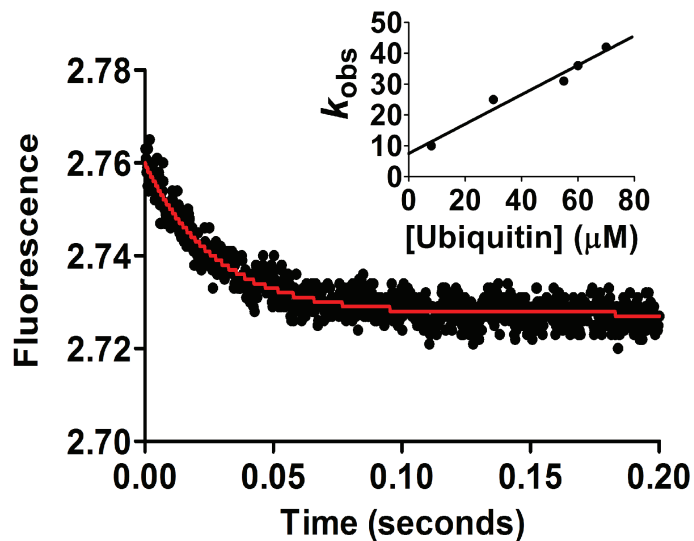

**Figure S1.** Stopped-flow fluorescence kinetic traces of the binding of ubiquitin to the C276A USP2 catalytic core. Stopped-flow fluorescence traces were obtained by monitoring the C276A USP2 tryptophan fluorescence quenching caused by ubiquitin binding. The data were fit to a single exponential function (solid red line) using GraphPad Prism (GraphPad Software, CA). The fitted rates were plotted against the concentration of ubiquitin (inset). The binding and dissociation rate constants,  $k_{on}$  and  $k_{off}$ , were determined through linear regression analysis (described in the Experimental Procedure section).

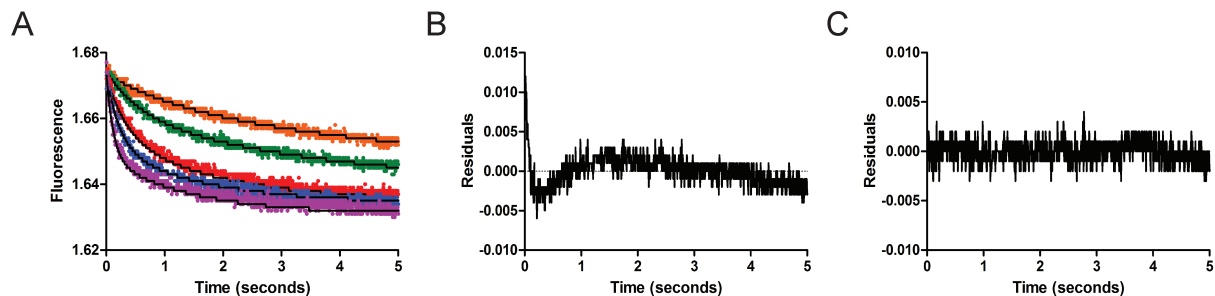

**Figure S2.** Stopped-flow fluorescence kinetic traces of the binding of native K48-linked diubiquitin to the C276A USP2 catalytic core. Stopped-flow fluorescence spectroscopy was used to follow complex formation over time. (A) USP2 tryptophan fluorescence quenching was monitored over 5 seconds for the native K48-linked diubiquitin binding to C276A USP2. Diubiquitin concentration was varied (orange is 2  $\mu\text{M}$ , green is 4  $\mu\text{M}$ , red is 8  $\mu\text{M}$ , blue is 16  $\mu\text{M}$ , and violet is 32  $\mu\text{M}$ ) while C276A USP2 concentration was held constant at 1  $\mu\text{M}$ . The black lines overlaid onto each fluorescence trace are the result of a double exponential fitting. Residuals for the single (B) and double (C) exponential fitting of the representative binding data for 16  $\mu\text{M}$  diubiquitin and 1  $\mu\text{M}$  USP2 are shown. Analyses of the residuals reveal that a double exponential function provides a significantly better fit to the data.

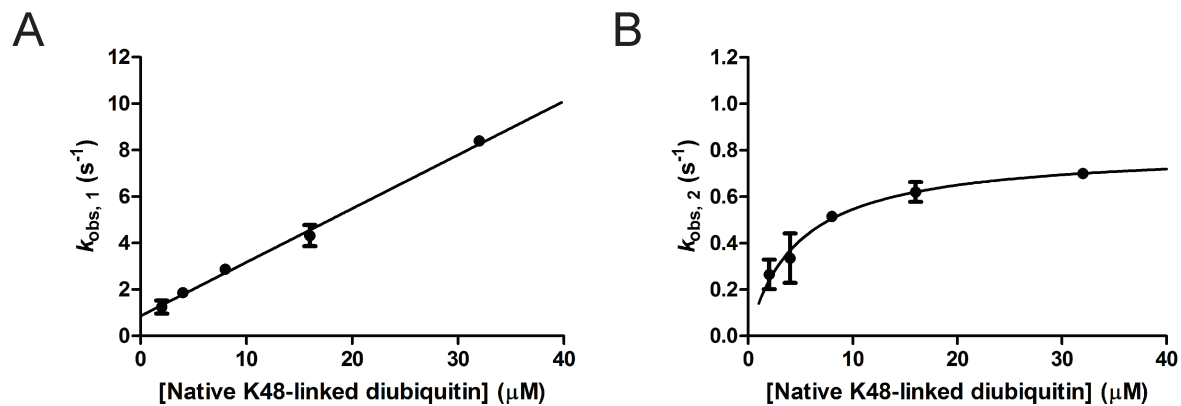

**Figure S3.** Concentration dependence of observed rates of native K48-linked diubiquitin binding to the C276A USP2 catalytic core. The double exponential rate constants  $k_{obs,1}$  and  $k_{obs,2}$  determined by fitting the fluorescence data reporting the native K48-linked diubiquitin binding to USP2 (see Figure S2) were plotted against the concentration of diubiquitin.

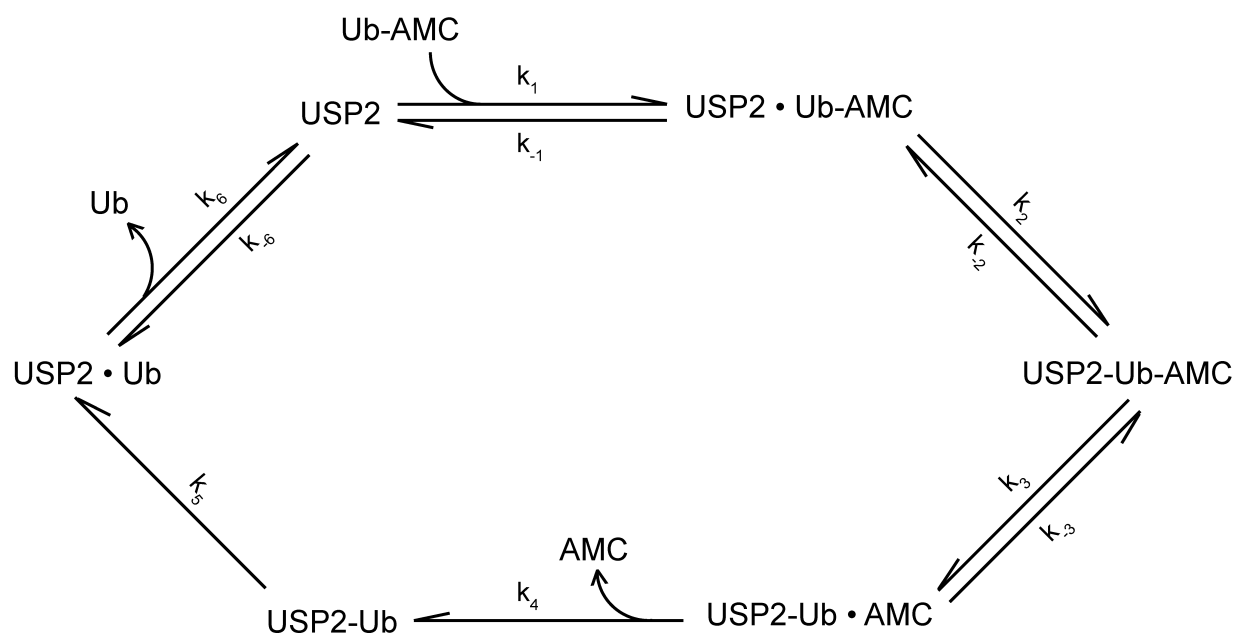

**Figure S4.** A more complex kinetic mechanism for USP2-catalyzed hydrolysis of Ub-AMC. This model allows for the formation of a tetrahedral intermediate (USP2-Ub-AMC), followed by a chemical step accounting for the collapse of the intermediate which yields the acyl-enzyme intermediate (USP2-Ub • AMC) where AMC is now non-covalently bound to USP2. This is followed by a step accounting for the dissociation of AMC.
